# Supplementary material for: Typing of Candida spp. from Colonized COVID-19 Patients Reveal Virulent Genetic Backgrounds and Clonal Dispersion
Source: MDPI journal article supplement (doi:10.3390/pathogens12101206), 2023-09-29
Supplement: s1 [file s1]

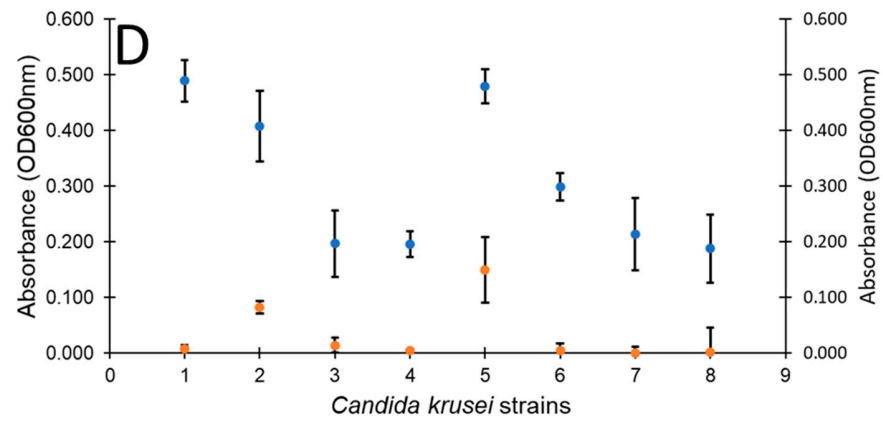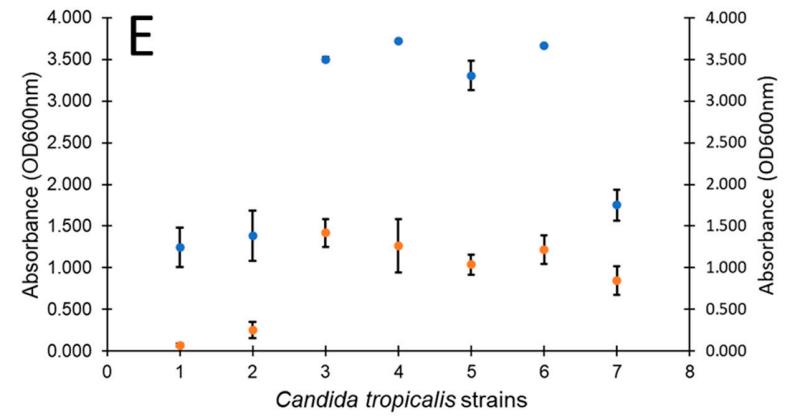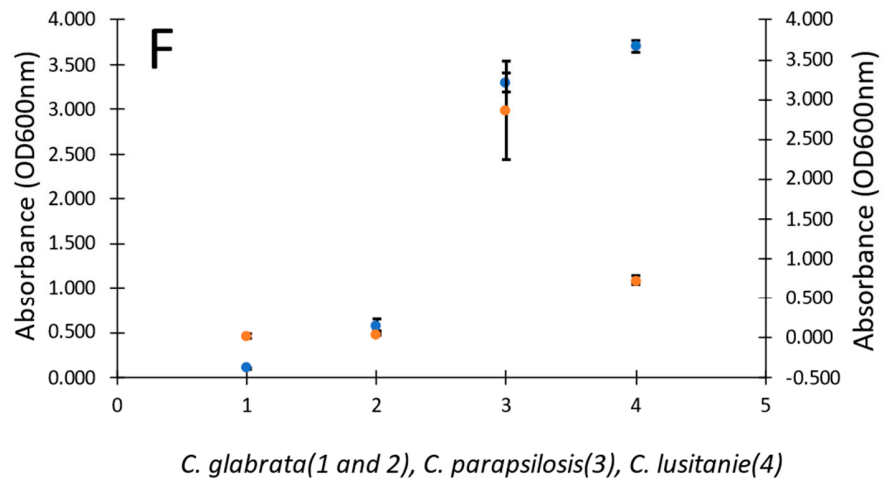

**Supplementary material Figure S1.** Adherent phenotype of the population of *C. krusei* (D), *C. tropicalis* (E), *C. glabrata*, *C. parapsilosis*, and *C. lusitaniae* (F) strains isolated from COVID-19 patients on polystyrene. (●) Without treatment with proteinase K, (●) With treatment with proteinase K (1 mg/mL).
